# Supplementary material for: Weaning strategies for the withdrawal of non-invasive respiratory support applying continuous positive airway pressure in preterm infants: a systematic review and meta-analysis
Source: PubMed Central journal article supplement — BMJ Paediatr Open. 2020 Nov 19;4(1):e000858. doi: 10.1136/bmjpo-2020-000858 (PMC7678397; doi:10.1136/bmjpo-2020-000858), 2020-11-19
Supplement: bmjpo-2020-000858supp002.pdf [file bmjpo-2020-000858supp002.pdf]

## Supplementary appendix 2: Characteristics of the included studies

| Author & Year<br>Country                                  | N   | Study population                                                                                                                     | Weaning readiness criteria                                                                                                                                                                                                                                                                                                                                                                                                                                                                  | Intervention                                                                                                                                                                                                                                                                                                         |                                                                                                               | Weaning failure criteria                                                                                                                                                                                                                                                                                                                                                       | Primary Outcomes                             |
|-----------------------------------------------------------|-----|--------------------------------------------------------------------------------------------------------------------------------------|---------------------------------------------------------------------------------------------------------------------------------------------------------------------------------------------------------------------------------------------------------------------------------------------------------------------------------------------------------------------------------------------------------------------------------------------------------------------------------------------|----------------------------------------------------------------------------------------------------------------------------------------------------------------------------------------------------------------------------------------------------------------------------------------------------------------------|---------------------------------------------------------------------------------------------------------------|--------------------------------------------------------------------------------------------------------------------------------------------------------------------------------------------------------------------------------------------------------------------------------------------------------------------------------------------------------------------------------|----------------------------------------------|
|                                                           |     |                                                                                                                                      |                                                                                                                                                                                                                                                                                                                                                                                                                                                                                             | Experimental group                                                                                                                                                                                                                                                                                                   | Control group                                                                                                 |                                                                                                                                                                                                                                                                                                                                                                                |                                              |
| Abdel-Hady et al<br>2011 <sup>[11]</sup><br>Ireland       | 60  | Mean GA 31.1 $\pm$ 2.6 and 31.0 $\pm$ 2.4 weeks in both study groups<br>CPAP                                                         | CPAP of 5 cmH <sub>2</sub> O and FiO <sub>2</sub> <0.30<br><u>Clinically stable:</u><br>1. Respiratory rate <60/min<br>2. No significant chest recession<br>3. No single apnea requiring bagging<br>4. Not more than 6 episodes of apnea requiring stimulation during the preceding 24h<br>5. Satisfactory arterial bloodgases (pH>7.25, PCO <sub>2</sub> <60 and base deficit <8)                                                                                                          | <u>Stepdown strategy:</u><br>Switch to HFNC with 2L/min; first reduction of FiO <sub>2</sub> to 0.21, then reduction of flow with 0.5L/min every 6h until discontinuation                                                                                                                                            | Reduction of FiO <sub>2</sub> on CPAP to 0.21, then stop CPAP                                                 | 1. Decreased SpO <sub>2</sub> <87% despite increasing FiO <sub>2</sub> to max 0.60<br>2. Increased WOB<br>3. Increased frequency of apnea and BC (>6 requiring stimulation/24h)<br>4. Severe apnea or BC that required PPV<br>5. Worsening bloodgases (PaCO <sub>2</sub> >65mmHG or pH<7.2)                                                                                    | 1. Duration of oxygen                        |
| Todd et al<br>2012 <sup>[7]</sup><br>Australia            | 154 | Mean GA 26.9 $\pm$ 1.6, 27.3 $\pm$ 1.5 and 27.1 $\pm$ 1.4 weeks in the 3 groups<br>CPAP with FiO <sub>2</sub> >0.25 for at least 24h | CPAP of 4-6 cmH <sub>2</sub> O and FiO <sub>2</sub> <0.25<br><u>Clinically stable:</u><br>1. Respiratory rate < 60/min<br>2. No significant chest recession<br>3. <3 episodes of self-reverting apneas (<20") and/ or BC (<100/min) and/or desaturation (<86%) in 1h for previous 6h<br>4. Average SpO <sub>2</sub> >86% most of the time or PaO <sub>2</sub> / TPao <sub>2</sub> >45mmHg<br>5. Not currently treated for PDA or sepsis<br>6. Tolerated time off CPAP during cares (>15min) | <u>Interval training (A):</u><br>CPAP 6h on and increasing periods of time off (starting with periods of 2h); when 16h off, trial stop CPAP<br><br><u>Interval training (B):</u><br>Similar as group 1, but with support of LFNC at 0.5L/min during times off. When trial of stop CPAP, continuation of LFNC for 24h | Stop CPAP                                                                                                     | 1. Increased WOB with RR >75/min<br>2. Increased apnea and/or BC and/or desaturations >2 in 1 hour for the previous 6h period<br>3. Increased FiO <sub>2</sub> >0.25 to maintain SpO <sub>2</sub> >86% and/ or PaO <sub>2</sub> / TPao <sub>2</sub> >45mmHg<br>4. pH <7.2<br>5. PaCO <sub>2</sub> / TPaco <sub>2</sub> >65mmHg<br>6. Major apnea or BC requiring resuscitation | 1. Time to wean off CPAP<br>2. CPAP duration |
| Rastogi et al<br>2013 <sup>[15]</sup><br>USA              | 56  | Mean GA 28.12 $\pm$ 1.67 weeks<br>CPAP (primary or post-extubation) for at least 48h                                                 | CPAP of 5 cmH <sub>2</sub> O and FiO <sub>2</sub> 0.21<br><u>Clinically stable:</u><br>1. No evidence of increased WOB<br>2. Stable for at least for 48h                                                                                                                                                                                                                                                                                                                                    | <u>Interval training:</u><br>CPAP 3h on and 3h off for 48h; if tolerated, periods of CPAP off increased to 6h for the next 48h; if tolerated, stop CPAP                                                                                                                                                              | Stop CPAP                                                                                                     |                                                                                                                                                                                                                                                                                                                                                                                | Success rate of the first trial to wean      |
| O'Donnell et al<br>2013 <sup>[12]</sup><br>United Kingdom | 78  | Median GA 28 weeks (range 24-32)<br>CPAP for at least 24h                                                                            | CPAP of 3-5 cmH <sub>2</sub> O and FiO <sub>2</sub> 0.21                                                                                                                                                                                                                                                                                                                                                                                                                                    | <u>Stepdown strategy:</u><br>Switch to LFNC (1L/min) with room air                                                                                                                                                                                                                                                   | Stop CPAP                                                                                                     | 1. >1 self-correcting apneic episode/hrs.<br>2. 1 apneic episode requiring moderate stimulation or bag-and-mask ventilation<br>3. Need for oxygen to maintain SpO <sub>2</sub> >85%<br>4. A score of 6-10 on the Silverman-Anderson Respiratory Scale                                                                                                                          | Weaning failure                              |
| Badiee et al<br>2015 <sup>[13]</sup><br>Iran              | 88  | Mean GA 31.2 $\pm$ 2.6 weeks<br>CPAP at 5 – 8cmH <sub>2</sub> O                                                                      | CPAP of 5 cmH <sub>2</sub> O and FiO <sub>2</sub> <0.30<br><u>Clinically stable:</u><br>1. Lack of apnea<br>2. No signs of respiratory distress                                                                                                                                                                                                                                                                                                                                             | <u>Stepdown strategy</u><br>Switch to HFNC 2L/min with FiO <sub>2</sub> 0.30; once FiO <sub>2</sub> weaned to 0.21, reduction of flow (0.5L/min every 1h) until flow of 0.5L/min; then stop HFNC                                                                                                                     | Continuation of CPAP 5 cmH <sub>2</sub> O and weaning of FiO <sub>2</sub> to 0.21; stop CPAP if stable for 6h | 1. Increased WOB<br>2. Significant retraction<br>3. Increased apnea<br>4. Abnormal blood gases (2 samples with an interval of >2hrs with pH<7.2, pCO <sub>2</sub> >65mmHg and paO <sub>2</sub> <50mmHg with FiO <sub>2</sub> >60%)                                                                                                                                             | Duration of oxygen requirement               |

**AcoRN:** Acute Care of at-Risk Newborn – **BC:** bradycardia – **CLD:** Chronic lung disease – **CPAP:** Continuous Positive Airway Pressure – **FiO<sub>2</sub>:** Fractional inspired oxygen concentration – **GA:** Gestational Age – **HFNC:** High flow nasal cannula – **IQR:** Inter quartile range – **kPa:** kiloPascal – **LFNC:** Low flow nasal cannula – **PaO<sub>2</sub>:** Partial arterial oxygen – **PaCO<sub>2</sub>:** Partial arterial carbon dioxide – **PCO<sub>2</sub>:** Partial carbon dioxide – **PDA:** Persistent ductus arteriosus – **PMA:** Post Menstrual Age – **PNA:** postnatal age – **PPV:** Positive pressure ventilation – **SpO<sub>2</sub>:** Pulse oximetry saturation – **TPaO<sub>2</sub>:** Transcutaneous partial arterial oxygen – **TPaCO<sub>2</sub>:** Transcutaneous partial arterial carbon dioxide – **WOB:** Work of breathing

## Supplementary appendix 2: Characteristics of the included studies (continued)

| Author & Year<br>Country                            | N   | Study population                                                                                                                                                                                                      | Weaning readiness criteria                                                                                                                                                                                                                                                                                                                                                                                                                                                                       | Intervention<br>Experimental group                                                                                                                                                                                                                                                                                                                                         | Control group                                                                                                                                                                 | Weaning failure criteria                                                                                                                                                                                                                                                                                                                                                                                                                            | Primary Outcomes                                                                                                                  |
|-----------------------------------------------------|-----|-----------------------------------------------------------------------------------------------------------------------------------------------------------------------------------------------------------------------|--------------------------------------------------------------------------------------------------------------------------------------------------------------------------------------------------------------------------------------------------------------------------------------------------------------------------------------------------------------------------------------------------------------------------------------------------------------------------------------------------|----------------------------------------------------------------------------------------------------------------------------------------------------------------------------------------------------------------------------------------------------------------------------------------------------------------------------------------------------------------------------|-------------------------------------------------------------------------------------------------------------------------------------------------------------------------------|-----------------------------------------------------------------------------------------------------------------------------------------------------------------------------------------------------------------------------------------------------------------------------------------------------------------------------------------------------------------------------------------------------------------------------------------------------|-----------------------------------------------------------------------------------------------------------------------------------|
| Tang et al<br>2015 <sup>[10]</sup><br>Australia     | 60  | Mean GA 27.5 weeks (range 24.0 – 29.9)<br>CPAP<br>Mean PMA at enrollment 31 weeks (range 27 – 37)                                                                                                                     | CPAP <5 cmH <sub>2</sub> O and FiO <sub>2</sub> <0.25<br><u>Clinically stable:</u><br>1. Respiratory rate <60/min<br>2. No significant chest recession,<br>3. <3 episodes of apnea, BC, oxygen desaturation in 1h for the previous 12h,<br>4. SpO <sub>2</sub> >86% most of the time or PaO <sub>2</sub> >45mmHg and<br>5. Not currently treated for PDA or sepsis                                                                                                                               | 1. <u>Stepdown strategy:</u><br>Switch to HFNC starting at flow 6L/min<br><br>2. <u>Interval training (A):</u><br>CPAP 6h alternated with ambient air/oxygen or LFNC during off periods; first progressive increase of time on air/LFNC and then decrease of time on CPAP<br><br>3. <u>Interval training (B):</u><br>Similar as A but CPAP 6h alternated with HFNC for 1h; | Stop CPAP to ambient air/oxygen (up to 25%) or to LFNC (<1L/min)                                                                                                              | 1. Increased WOB with respiratory rate >75 per minute,<br>2. Increased apnea and/or BC and/or desaturations >2 in 1h for the previous 6h period<br>3. FiO <sub>2</sub> >0.25 to maintain SpO <sub>2</sub> >86% and/or PaO <sub>2</sub> >45mmHg<br>4. pH <7.2,<br>5. PaCO <sub>2</sub> >65mmHg<br>6. Apnea or BC requiring resuscitation                                                                                                             | 1. CLD,<br>2. Days respiratory support (CPAP or HFNC or Oxygen)<br>3. Days of hospital stay<br>4. Days to achieve full suck feeds |
| Nair et al<br>2015 <sup>[16]</sup><br>Canada        | 30  | Median GA 27 weeks (IQR 26-28) and 27 weeks (IQR 26-27) in both study groups<br>Post-extubation CPAP for at least 72h                                                                                                 | CPAP of 4 cmH <sub>2</sub> O                                                                                                                                                                                                                                                                                                                                                                                                                                                                     | <u>Interval training:</u><br>Weaning schedule over 72h of CPAP alternated with LFNC (1L/min) with decreasing time on CPAP and increasing time on LFNC                                                                                                                                                                                                                      | Continuation of CPAP 4 cmH <sub>2</sub> O for 72h; then switch to LFNC (1L/min)                                                                                               | 1. ACoRN respiratory score of 5 or more, or increase in previous score<br>2. FiO <sub>2</sub> >0.30<br>3. Acidosis (pH < 7.20)<br>4. Apnea with BC/desaturation requiring stimulation (>1/h)<br>5. Apnea requiring bag and mask ventilation                                                                                                                                                                                                         | Successful weaning                                                                                                                |
| Soonsawad et al<br>2016 <sup>[14]</sup><br>Thailand | 101 | Median GA 29 weeks (IQR 27-30) PNA at enrollment median 8 days (IQR 4-28) and 7.5 days (IQR 3-20) in both groups                                                                                                      | CPAP ≤6 cmH <sub>2</sub> O and FiO <sub>2</sub> <0.30<br><u>Clinically stable:</u><br>1. Sat 88 - 93%<br>2. <3 Apnea or BC in 1h<br>3. No clinical signs of RDS<br>4. Being able to take off devices during nursing care<br>5. no clinical sign of hemodynamic significant PDA                                                                                                                                                                                                                   | <u>Stepdown strategy:</u><br>Switch to HFNC at 4 L/min (<1000g) or 5-6 L/min (>1000g)<br>First decrease FiO <sub>2</sub> then decrease flow rate (1 L/min for 24h) until 3 L/min (>1000g) or 2 L/min (<1000g); then stop or switch to LFNC                                                                                                                                 | <u>Gradual weaning</u><br>First decrease FiO <sub>2</sub> , then decrease CPAP pressure (1cmH <sub>2</sub> O for 24h) until 4 cmH <sub>2</sub> O; then stop or switch to LFNC | 1. Increased WOB<br>2. Apnea or BC or desaturation >3 times within 1h during 6h under observation<br>3. Apnea requiring positive pressure ventilation<br>4. FiO <sub>2</sub> >0.6 to keep SpO <sub>2</sub> 88-93%<br>5. pH <7.25 or pCO <sub>2</sub> >65mmHg                                                                                                                                                                                        | Time to wean                                                                                                                      |
| Amataya et al<br>2017 <sup>[8]</sup><br>USA         | 68  | Mean GA 28.7 ± 1.8 and 28.5 ± 1.9 weeks in both study groups<br>CPAP (primary or post-extubation) for at least 48h<br>Days to reach FiO <sub>2</sub> 0.21 on CPAP 5.6 ± 12.4 and 5.7 ± 12.6 days in both study groups | CPAP of 5cmH <sub>2</sub> O and FiO <sub>2</sub> 0.21 for at least 48h<br><u>Clinically stable:</u><br>1. Normal WOB, no persistent tachypnea, no marked retractions<br>2. No apnea associated with BC or cyanosis with >2 episodes in 12h or >3 in 24h with at least one requiring bag and mask ventilation<br>3. SpO <sub>2</sub> >90%<br>4. Not currently treated for PDA or sepsis at the time of weaning<br>5. Tolerated time off CPAP during nursing cluster care up to 15 minutes or more | <u>Gradual weaning:</u><br>Weaning over 24h, i.e. reduction of CPAP pressure with 1 cmH <sub>2</sub> O every 8h, up to 3 cmH <sub>2</sub> O; then stop CPAP                                                                                                                                                                                                                | Stop CPAP                                                                                                                                                                     | 1. Increased WOB: persistent tachypnea (>60 for 2h) and marked retractions<br>2. Apnea (cessation of respiration >20s) associated with BC or cyanosis with >2 episodes in 12h or >3 in 24h with at least one requiring bag and mask ventilation<br>3. FiO <sub>2</sub> >0.21 to maintain sat. >90% for over 2h in 24h<br>4. Abnormal blood gases (2 arterial samples >2h apart) with low pH<7.2, PaO <sub>2</sub> >65mmHg, PaO <sub>2</sub> <50mmHg | Success rate of the first trial of CPAP weaning                                                                                   |

**AcORN:** Acute Care of at-Risk Newborn – **BC:** bradycardia – **CLD:** Chronic lung disease – **CPAP:** Continuous Positive Airway Pressure – **FiO<sub>2</sub>:** Fractional inspired oxygen concentration – **GA:** Gestational Age – **HFNC:** High flow nasal cannula – **IQR:** Inter quartile range – **kPa:** kiloPascal – **LFNC:** Low flow nasal cannula – **PaO<sub>2</sub>:** Partial arterial oxygen – **PaCO<sub>2</sub>:** Partial carbon dioxide – **PCO<sub>2</sub>:** Partial carbon dioxide – **PDA:** Persistent ductus arteriosus – **PMA:** Post Menstrual Age – **PNA:** postnatal age – **PPV:** Positive pressure ventilation – **SpO<sub>2</sub>:** Pulse oximetry saturation – **TPaO<sub>2</sub>:** Transcutaneous partial arterial oxygen – **TPaCO<sub>2</sub>:** Transcutaneous partial arterial carbon dioxide – **WOB:** Work of breathing

## Supplementary appendix 2: Characteristics of the included studies (continued)

| Author & Year<br>Country                        | N   | Study population                                                                                                                                                                                 | Weaning readiness criteria                                                                                                                                                                                                                                                                                                                                                                              | Intervention                                                                                                                                                                                                                                                                                     |                                                                                                                                                                                                   | Weaning failure criteria                                                                                                                                                                                                                                                                                                  | Primary Outcomes                                                                                                    |
|-------------------------------------------------|-----|--------------------------------------------------------------------------------------------------------------------------------------------------------------------------------------------------|---------------------------------------------------------------------------------------------------------------------------------------------------------------------------------------------------------------------------------------------------------------------------------------------------------------------------------------------------------------------------------------------------------|--------------------------------------------------------------------------------------------------------------------------------------------------------------------------------------------------------------------------------------------------------------------------------------------------|---------------------------------------------------------------------------------------------------------------------------------------------------------------------------------------------------|---------------------------------------------------------------------------------------------------------------------------------------------------------------------------------------------------------------------------------------------------------------------------------------------------------------------------|---------------------------------------------------------------------------------------------------------------------|
|                                                 |     |                                                                                                                                                                                                  |                                                                                                                                                                                                                                                                                                                                                                                                         | Experimental group                                                                                                                                                                                                                                                                               | Control group                                                                                                                                                                                     |                                                                                                                                                                                                                                                                                                                           |                                                                                                                     |
| Eze et al<br>2018 <sup>[17]</sup><br>USA        | 80  | Mean GA 26.5 weeks (range 23.6-30.6) and 27.4 weeks (range 23.9-30.7) in both groups<br>CPAP for at least 24h<br>PNA at enrollment 37 days (range 3-100) and 31 days (range 3-67) in both groups | CPAP of 5-6 cmH <sub>2</sub> O and FiO <sub>2</sub> ≤0.30 for at least 24h<br>And:<br>1. PMA ≥ 26 0/7 w<br>2. loaded with caffeine<br>3. stable respiratory assessment and Hb ≥ 8 g/dL                                                                                                                                                                                                                  | <u>Interval training</u><br>CPAP alternated with LFNC (< 2 L/min):<br>9h CPAP and 3h LFNC for 24h; then 6h CPAP and 6h LFNC for 24h; then 3h CPAP and 9h LFNC for 24h; then room air or LFNC after 24h of re-recruitment with CPAP                                                               | If CPAP 6 cmH <sub>2</sub> O: weaned to 5 cmH <sub>2</sub> O for 96h, then stop or switch to LFNC (≤ 2 L/min)<br><br>If CPAP 5 cmH <sub>2</sub> O: continued for 96h, then stop or switch to LFNC | 1. Increased WOB<br>2. RR >70/min over 1h<br>3. FiO <sub>2</sub> >0.30 and/or >2 l/min via NC to keep SaO <sub>2</sub> levels over 86%<br>4. Apnea or BC requiring resuscitation, ranging from bag and mask ventilation to intubation                                                                                     | Successful wean off CPAP during the first trial (=total 7 days: 4 days weaning, 3 days observation) without failure |
| Yang et al<br>2018 <sup>[18]</sup><br>Taiwan    | 181 | Mean GA 28.8 ± 2.4 weeks<br>Positive pressure respiratory support for at least 24h<br>Mean PMA at enrollment 33.3 ± 2.4 and 34.3 ± 2.4 weeks                                                     | CPAP of 5-7 cmH <sub>2</sub> O and FiO <sub>2</sub> <0.25 for 24h<br>And:<br>1. weight > 1250 g<br>2. Hb >10 g/dL<br>3. No use of vasoactive or sedative agents                                                                                                                                                                                                                                         | <u>Interval training (A)</u><br>CPAP alternated with LFNC oxygen at 0.2 L/min: increasing time off CPAP every 24h (4-8-12h); then stop CPAP<br><br><u>Interval training (B)</u><br>CPAP alternated with LFNC air flow at 1.5 L/min: increasing time off CPAP every 24h (4-8-12h); then stop CPAP | Continuation of CPAP at 4 – 6 cmH <sub>2</sub> O for 5 days, then stop to room air or LFNC oxygen as needed                                                                                       | 1. Increased WOB<br>2. Increase apnea and/or BC events and/or 2 desaturation periods in 1h for the previous 6h-period<br>3. Increase FiO <sub>2</sub> >0.25 to maintain SpO <sub>2</sub> >86%<br>4. pH <7.2<br>5. PaO <sub>2</sub> / TPaO <sub>2</sub> of >65mmHg<br>6. Major apnea or BC episode requiring resuscitation | 1. Length of weaning duration<br>2. Body weight and post conceptional age of successful weaning                     |
| Jenssen et al<br>2018 <sup>[9]</sup><br>Denmark | 354 | Median GA 30 weeks (IQR 29-31)<br>CPAP for at least 24h<br>Median PMA at enrollment 32 weeks (IQR 31-32)                                                                                         | CPAP <8 cmH <sub>2</sub> O and FiO <sub>2</sub> <0.30<br>And:<br>1. PMA ≥ 29 0/7 weeks<br>2. Respiratory rate <70/min<br>3. <3 episodes of BC or desaturations in 24hrs<br>4. Tolerate CPAP off during nursing procedures (up to 15 min)                                                                                                                                                                | <u>Gradual weaning group</u><br>Reduction of CPAP pressure with 1 cmH <sub>2</sub> O every day, down to 4 cmH <sub>2</sub> O; then stop CPAP                                                                                                                                                     | Stop CPAP                                                                                                                                                                                         | 1. RR >70 per minute<br>2. Difficult breathing with retractions<br>3. Increased oxygen requirement by more than 10%<br>4. >3 episodes of oxygen sat <70% or heart rate <70 BPM in 24hrs<br>5. Major apnea or BC requiring resuscitation<br>6. TCO <sub>2</sub> >2kPa starting point                                       | Weight gain velocity (g/kg/d)                                                                                       |
| Mohammadzadeh<br>2019 <sup>[19]</sup><br>Iran   | 62  | Mean GA 30.5 ± 2.6 and 30.1 ± 1.8 weeks in both study groups<br>CPAP (primary for RDS or post-extubation) for at least 24h<br>Mean PMA at enrollment 31.0 ± 2.4 and 31.1 ± 3.7 weeks             | CPAP of 5 cmH <sub>2</sub> O and FiO <sub>2</sub> 0.21 for 24h<br><u>Clinically stable:</u><br>1. RR <60/min<br>2. Absence of diaphragmatic or sternal retraction<br>3. <6 episodes of apnea and BC within 24h<br>4. Absence of apnea requiring PPV<br>5. SpO <sub>2</sub> most of the time >86%<br>6. No PDA or sepsis<br>7. Tolerability of separation from CPAP for nursing care episodes (>15 min.) | <u>Interval training:</u><br>CPAP (ON) alternated with room air or ambient oxygen (OFF): increasing time off CPAP every 24h (4h - 8h - 12h); then stop CPAP                                                                                                                                      | Stop CPAP                                                                                                                                                                                         | 1. SpO <sub>2</sub> <87% and increased oxygen need 0.60<br>2. Increased WOB<br>3. >6 episodes of apnea and BC within 24h improving with slight stimulation<br>4. 1 episode of severe apnea or BC requiring PPV<br>5. Arterial pH<7.2 or PCO <sub>2</sub> >65mmHg                                                          | Successful CPAP weaning at first attempt                                                                            |

**AcORN:** Acute Care of at-Risk Newborn – **BC:** bradycardia – **CLD:** Chronic lung disease – **CPAP:** Continuous Positive Airway Pressure – **FiO<sub>2</sub>:** Fractional inspired oxygen concentration – **GA:** Gestational Age – **HFNC:** High flow nasal cannula – **IQR:** Inter quartile range – **kPa:** kiloPascal – **LFNC:** Low flow nasal cannula – **PaO<sub>2</sub>:** Partial arterial oxygen – **PaCO<sub>2</sub>:** Partial arterial carbon dioxide – **PCO<sub>2</sub>:** Partial carbon dioxide – **PDA:** Persistent ductus arteriosus – **PMA:** Post Menstrual Age – **PNA:** postnatal age – **PPV:** Positive pressure ventilation – **SpO<sub>2</sub>:** Pulse oximetry saturation – **TPaO<sub>2</sub>:** Transcutaneous partial arterial oxygen – **TPaCO<sub>2</sub>:** Transcutaneous partial arterial carbon dioxide – **WOB:** Work of breathing
