# Supplementary figures and images for: Weaning strategies for the withdrawal of non-invasive respiratory support applying continuous positive airway pressure in preterm infants: a systematic review and meta-analysis
Source: HighWire-hosted journal article supplement (doi:10.1136/bmjpo-2020-000858), 2020-11-01

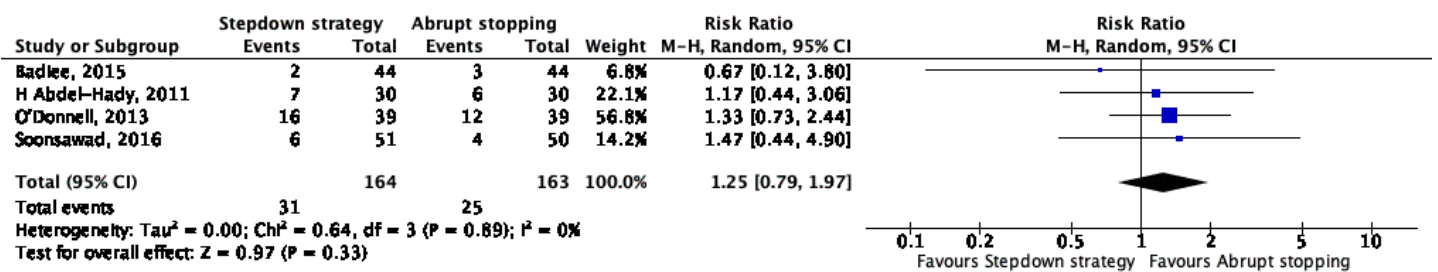

Supplement: bmjpo-2020-000858supp003_data_supplement.pdf [file bmjpo-2020-000858supp003_data_supplement.pdf]
